# Supplementary material for: Microarray analysis reveals global modulation of endogenous retroelement transcription by microbes
Source: PubMed Central journal article supplement (PMC4222864; doi:10.1186/1742-4690-11-59), 2014-07-25
Supplement: 12977_2014_3913_MOESM1_ESM.pdf [file 12977_2014_3913_MOESM1_ESM.pdf]

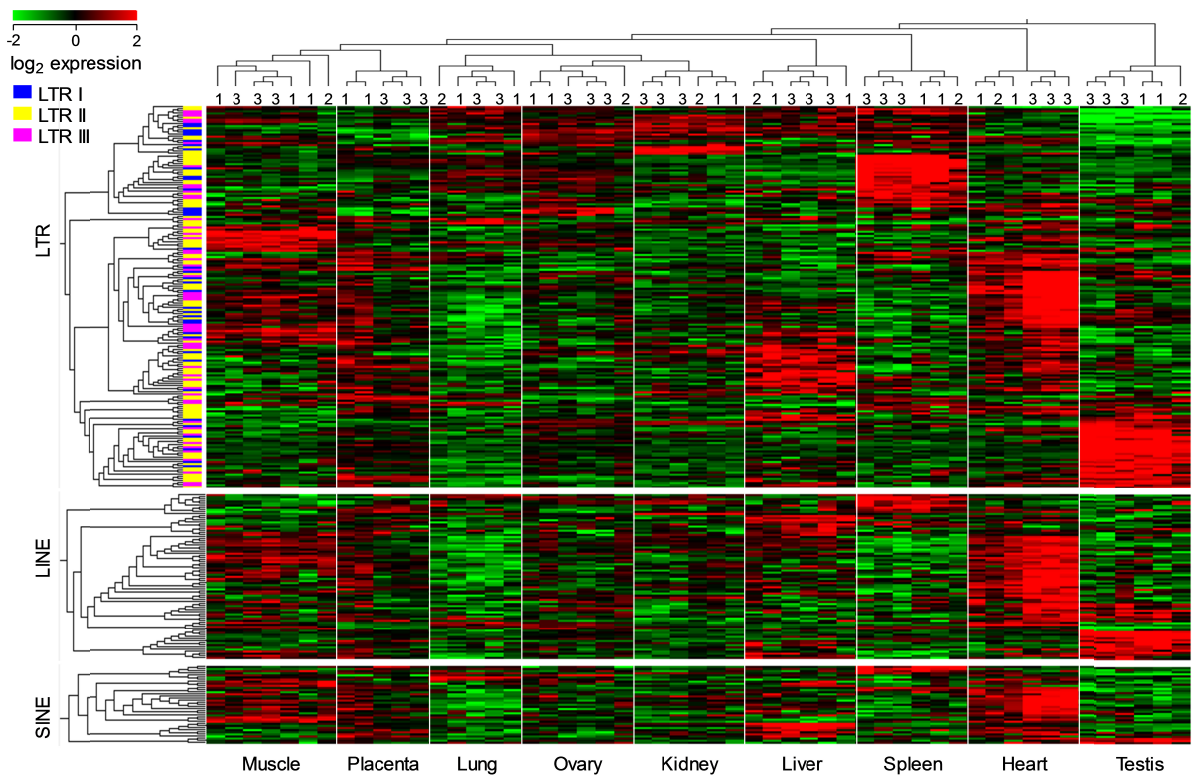

**Figure S1 Tissue-specific RE expression patterns**

Hierarchally-clustered heatmap of RE-specific probes significantly regulated between B6 tissues for three independent experiments using the Mouse Genome 430 v2 microarray platform ( $p < 0.001$  by ANOVA comparing tissues and eliminating experiment). Data are obtained from E-GEOD-1986, -9954, and -10246, which are identified with numbers 1, 2 and 3, respectively.
